# Supplementary material for: Factors controlling plankton productivity, particulate matter stoichiometry, and export fluxin the coastal upwelling system off Peru
Source: Copernicus journal article supplement (doi:10.5194/bg-2020-35), 2020-02-18
Supplement: Supplementary file 1 [file bg-2020-35-supplement.pdf]

1 **Supplementary material**

2 **Table S1.** Dissolved iron (DFe) concentrations (nM) integrated over the water column (0 – 17  
3 m). Please note that DFe is always above growth limiting concentrations and therefore most  
4 likely did not control productivity in by the plankton community.

| Mesocosm | Day 3 | Day 17 | Day 48 |
|----------|-------|--------|--------|
| M1       | 17.8  | 10.8   | 6.9    |
| M2       | 11.7  | 6.4    | 6.8    |
| M3       | 13.9  | 5.9    | 5.4    |
| M4       | 14.8  | 7.6    | 3.1    |
| M5       | 13.4  | 10.6   | 5.2    |
| M6       | 13.6  | 7.1    | 6.4    |
| M7       | 11.9  | 5.7    | 9.5    |
| M8       | 11.9  | 9.5    | 8.5    |
| Pacific  | -     | -      | 8.5    |

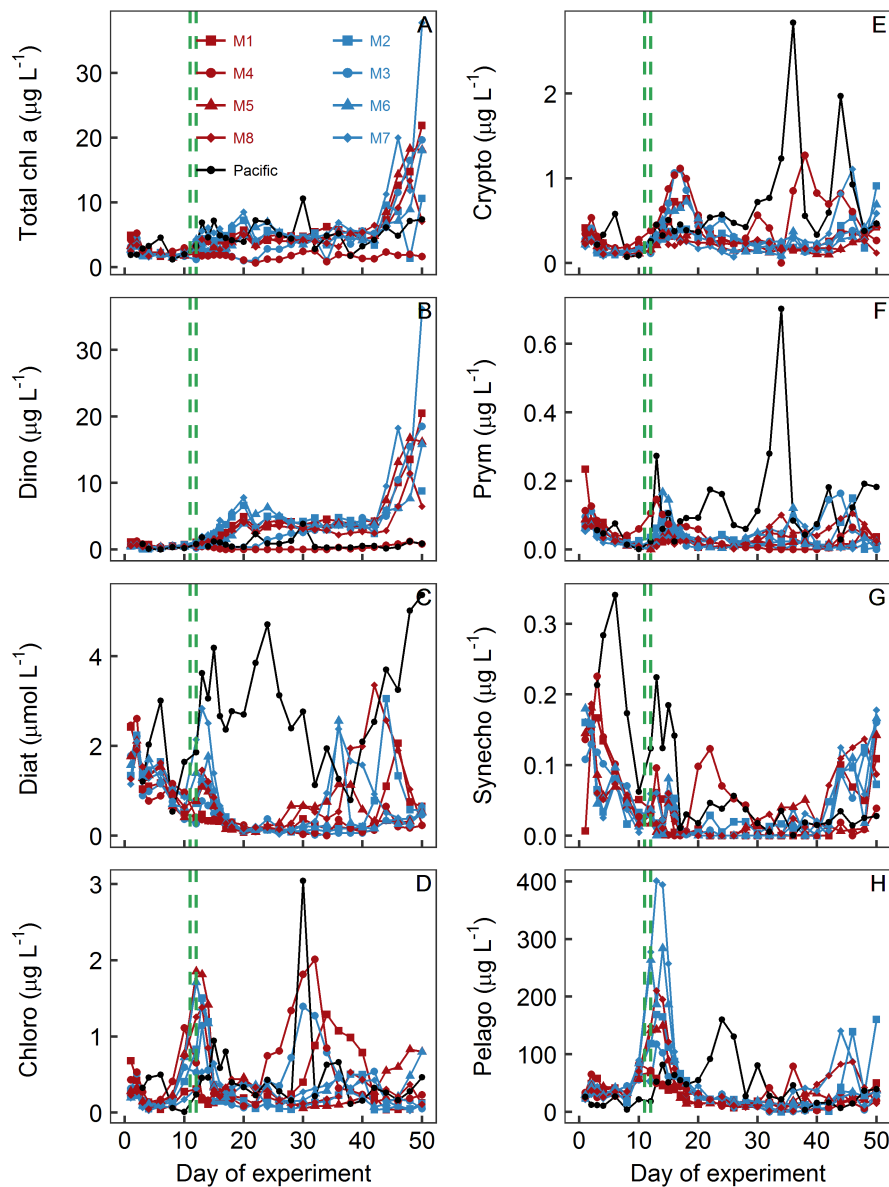

6

7 **Figure S1.** Phytoplankton development based on the CHEMTAX analysis. Shown here are ch-  
 8 a concentrations contributed by the individual taxa where the sum of all taxa is the total chl-a  
 9 concentration shown in plot A. Note the different y-axis scaling (A) Total chl-a. (B)  
 10 Dinophyceae. (C) Diatoms. (D) Chlorophyceae. (E) Cryptophyceae. (F) *Synechococcus*. (D)  
 11 Pelagophyceae. The green lines mark the days of OMZ water addition. Concentrations are  
 12 averages over the entire water column (0 – 17 m).

13

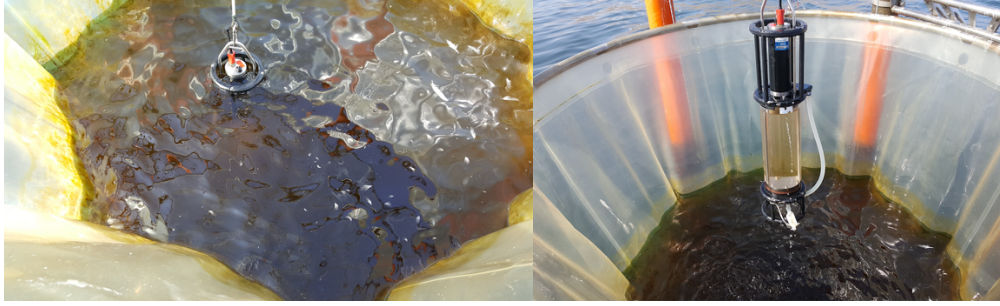

14

15 **Figure S2.** Pictures from the surface water during the orni-eutrophication event at the end of  
16 the study (M7, day 48). Left: Mesocosm surface. Right: Integrating water sampler filled with  
17 water from the upper 0.2 m.

18

19
